# Supplementary material for: Economic and Humanistic Burden of Cerebral Vasospasm and Its Related Complications after Aneurysmal Subarachnoid Hemorrhage: A Systematic Literature Review
Source: Springer Nature journal article supplement (doi:10.1007/s40120-022-00348-6), 2022-04-20
Supplement: MOESM1 [file 20327104]

# **Economic and Humanistic Burden of Cerebral Vasospasm and Its Related Complications after Aneurysmal Subarachnoid Hemorrhage: a Systematic Literature Review**

## **Authors**

Juliette C. Thompson · François-Xavier Chalet · Eric J. Manalastas · Neil Hawkins · Grammati Sarri ·  
Darren A. Talbot

## **Author affiliations**

J. C. Thompson · E. J. Manalastas · N. Hawkins · G. Sarri

Visible Analytics, Oxford, UK

F-X Chalet · D. A. Talbot

Idorsia Pharmaceuticals Ltd, Hegenheimermattweg 91, 4123 Allschwil, Switzerland

**Corresponding author:** Juliette C. Thompson [juliette.thompson@visibleanalytics.co.uk](mailto:juliette.thompson@visibleanalytics.co.uk)

## Supplementary Material

**Table S1.** Embase and Medline search strategies (searched via Embase.com)

| No. | Query                                                                                                                                                                                                                                                                                                                                                                                                                                                                                                                                                                                                                                                                                                                                                                                                                                                                                                                                                                                                                                                      |
|-----|------------------------------------------------------------------------------------------------------------------------------------------------------------------------------------------------------------------------------------------------------------------------------------------------------------------------------------------------------------------------------------------------------------------------------------------------------------------------------------------------------------------------------------------------------------------------------------------------------------------------------------------------------------------------------------------------------------------------------------------------------------------------------------------------------------------------------------------------------------------------------------------------------------------------------------------------------------------------------------------------------------------------------------------------------------|
| #1  | 'subarachnoid hemorrhage'/exp                                                                                                                                                                                                                                                                                                                                                                                                                                                                                                                                                                                                                                                                                                                                                                                                                                                                                                                                                                                                                              |
| #2  | (subarachnoid NEXT/2 (hemorrhage OR haemorrhage)):ti,ab                                                                                                                                                                                                                                                                                                                                                                                                                                                                                                                                                                                                                                                                                                                                                                                                                                                                                                                                                                                                    |
| #3  | 'intracranial aneurysm'/exp                                                                                                                                                                                                                                                                                                                                                                                                                                                                                                                                                                                                                                                                                                                                                                                                                                                                                                                                                                                                                                |
| #4  | 'intracranial aneurysm':ti,ab OR 'aneurysm':ti,ab OR 'aneurysmal':ti,ab OR 'brain infarction':ti,ab OR 'brain ischemia':ti,ab OR 'cerebral infarction':ti,ab OR 'cerebral ischemia':ti,ab                                                                                                                                                                                                                                                                                                                                                                                                                                                                                                                                                                                                                                                                                                                                                                                                                                                                  |
| #5  | (#1 OR #2) AND (#3 OR #4)                                                                                                                                                                                                                                                                                                                                                                                                                                                                                                                                                                                                                                                                                                                                                                                                                                                                                                                                                                                                                                  |
| #6  | 'aneurysmal subarachnoid hemorrhage':ti,ab OR 'aneurysmal subarachnoid haemorrhage':ti,ab                                                                                                                                                                                                                                                                                                                                                                                                                                                                                                                                                                                                                                                                                                                                                                                                                                                                                                                                                                  |
| #7  | #5 OR #6                                                                                                                                                                                                                                                                                                                                                                                                                                                                                                                                                                                                                                                                                                                                                                                                                                                                                                                                                                                                                                                   |
| #8  | 'vasospasm':ti,ab OR 'brain vasospasm':ti,ab                                                                                                                                                                                                                                                                                                                                                                                                                                                                                                                                                                                                                                                                                                                                                                                                                                                                                                                                                                                                               |
| #9  | #7 OR #8                                                                                                                                                                                                                                                                                                                                                                                                                                                                                                                                                                                                                                                                                                                                                                                                                                                                                                                                                                                                                                                   |
| #10 | 'health care cost'/exp OR 'drug cost'/exp OR 'cost of illness'/exp OR 'hospital cost'/exp OR 'pharmacoeconomics'/exp OR 'treatment cost*':ti,ab OR 'direct cost*':ti,ab OR 'direct medical cost*':ti,ab OR 'nonmedical cost*':ti,ab OR 'non-medical cost*':ti,ab OR 'total cost*':ti,ab OR 'cost per patient treated':ti,ab OR 'budget impact':ti,ab OR 'cost burden':ti,ab OR 'societal cost*':ti,ab OR 'administrative cost*':ti,ab OR 'travel cost*':ti,ab OR 'travel time':ti,ab OR 'disease cost':ti,ab OR 'cost of drugs':ti,ab                                                                                                                                                                                                                                                                                                                                                                                                                                                                                                                      |
| #11 | 'indirect cost*':ti,ab OR 'disability':ti,ab OR 'functional status':ti,ab OR 'physical function':ti,ab OR 'impairment':ti,ab OR 'disabilities':ti,ab OR 'productivity':ti,ab OR 'employment':ti,ab OR 'retirement':ti,ab OR 'work disability':ti,ab OR 'absenteeism':ti,ab OR 'presenteeism':ti,ab OR 'sick leave':ti,ab OR 'sick day':ti,ab OR 'worktime loss':ti,ab OR 'opportunity loss':ti,ab OR 'job performance':ti,ab OR ((work NEAR/2 loss):ti,ab)                                                                                                                                                                                                                                                                                                                                                                                                                                                                                                                                                                                                 |
| #12 | 'healthcare resource*':ti,ab OR 'medical resource*':ti,ab OR 'healthcare resource use':ti,ab OR 'health resource consumption':ti,ab OR 'health care consumption':ti,ab OR 'medical resource consumption':ti,ab OR 'hospital admission*':ti,ab OR 'icu admission*':ti,ab OR 'emergency department visit*':ti,ab OR 'emergency room visit*':ti,ab OR 'er visit*':ti,ab OR 'ed visit*':ti,ab OR 'inpatient visit*':ti,ab OR 'outpatient visit*':ti,ab OR 'specialist visit*':ti,ab OR 'unscheduled doctor visit*':ti,ab OR 'unscheduled physician visit*':ti,ab OR 'general practitioner visit*':ti,ab OR 'hospitalization':ti,ab OR 'health care utilization'/exp OR 'hospitalization'/exp OR 'length of stay':ti,ab OR 'discharge*':ti,ab OR 'readmission':ti,ab                                                                                                                                                                                                                                                                                            |
| #13 | 'quality adjusted life year*':ti,ab OR 'qaly':ti,ab OR 'qalys':ti,ab                                                                                                                                                                                                                                                                                                                                                                                                                                                                                                                                                                                                                                                                                                                                                                                                                                                                                                                                                                                       |
| #14 | 'cost utility analysis'/exp OR 'cost minimization analysis'/exp OR 'economic evaluation'/exp OR 'cost benefit analysis'/exp OR 'cost effectiveness analysis'/exp OR 'cost-consequence':ti,ab OR 'cost-minimisation':ti,ab OR 'cost minimisation':ti,ab OR 'cost-minimization':ti,ab OR 'cost minimization':ti,ab OR 'cost effectiveness':ti,ab OR 'icer':ti,ab OR 'incremental cost effectiveness ratio':ti,ab OR ('cost effectiveness':ti,ab AND ratio:ti,ab) OR 'incremental cost-effectiveness ratio':ti,ab                                                                                                                                                                                                                                                                                                                                                                                                                                                                                                                                             |
| #15 | #10 OR #11 OR #12 OR #13 OR #14                                                                                                                                                                                                                                                                                                                                                                                                                                                                                                                                                                                                                                                                                                                                                                                                                                                                                                                                                                                                                            |
| #16 | 'quality of life'/exp OR 'qol':ti,ab OR 'quality of life':ti,ab OR 'hrql':ti,ab OR 'hrqol':ti,ab OR 'hr qol':ti,ab OR 'hql':ti,ab OR 'hqol':ti,ab OR 'h qol':ti,ab OR 'quality adjusted life year*':ti,ab OR 'quality adjusted life':ti,ab OR 'qaly*':ti,ab OR 'disability adjusted life year*':ti,ab OR 'disability adjusted life':ti,ab OR 'daly*':ti,ab OR 'patient reported outcome*':ti,ab OR 'satisfaction':ti,ab OR 'preference*':ti,ab OR 'activities of daily living':ti,ab OR 'adl':ti,ab OR 'assessment of quality of life':ti,ab OR 'aqol':ti,ab OR 'quality of well being scale':ti,ab OR 'sf36':ti,ab OR 'sf 36':ti,ab OR 'short form 36':ti,ab OR 'shortform 36':ti,ab OR 'sf thirtysix':ti,ab OR 'sf thirty six':ti,ab OR 'shortform thirtysix':ti,ab OR 'shortform thirty six':ti,ab OR 'short form thirtysix':ti,ab OR 'short form thirty six':ti,ab OR 'sf6':ti,ab OR 'sf 6':ti,ab OR 'short form 6':ti,ab OR 'shortform 6':ti,ab OR 'sf six':ti,ab OR 'sfsix':ti,ab OR 'shortform six':ti,ab OR 'short form six':ti,ab OR 'sf6d':ti,ab |

|            |                                                                                                                                                                                                                                                                                                                                                                                                                                                                                                                                                                                                                                                                                                                                                                                                                                                                   |
|------------|-------------------------------------------------------------------------------------------------------------------------------------------------------------------------------------------------------------------------------------------------------------------------------------------------------------------------------------------------------------------------------------------------------------------------------------------------------------------------------------------------------------------------------------------------------------------------------------------------------------------------------------------------------------------------------------------------------------------------------------------------------------------------------------------------------------------------------------------------------------------|
|            | OR 'sf 6d':ti,ab OR 'short form 6d':ti,ab OR 'shortform 6d':ti,ab OR 'sf six d':ti,ab OR 'sfsixd':ti,ab OR 'shortform six d':ti,ab OR 'short form six d':ti,ab OR 'sf12':ti,ab OR 'sf 12':ti,ab OR 'short form 12':ti,ab OR 'shortform 12':ti,ab OR 'sf twelve':ti,ab OR 'sftwelve':ti,ab OR 'shortform twelve':ti,ab OR 'short form twelve':ti,ab OR 'sf20':ti,ab OR 'sf 20':ti,ab OR 'short form 20':ti,ab OR 'shortform 20':ti,ab OR 'sf twenty':ti,ab OR 'sftwenty':ti,ab OR 'shortform twenty':ti,ab OR 'short form twenty':ti,ab OR 'eq 5d':ti,ab OR 'eq5d':ti,ab OR 'euroqol':ti,ab OR 'euro qol':ti,ab OR 'health status':ti,ab OR 'hye':ti,ab OR 'hyes':ti,ab OR 'health* year* equivalent*':ti,ab OR 'the oxford participation and activities questionnaire':ti,ab OR 'ox-paq':ti,ab OR 'stroke specific quality of life scale':ti,ab OR 'ss-qol':ti,ab |
| <b>#17</b> | 'psychological well-being'/exp OR ('utilit*':ti,ab AND 'health':ti,ab) OR ('utilit*':ti,ab AND 'scor*':ti,ab) OR ('utilit*':ti,ab AND 'valu*':ti,ab) OR ('disutilit*':ti,ab AND 'health':ti,ab) OR ('disutilit*':ti,ab AND 'scor*':ti,ab) OR ('disutilit*':ti,ab AND 'valu*':ti,ab) OR 'utilit*':ti,ab OR 'disutilit*':ti,ab OR 'standard gamble':ti,ab OR 'time trade off':ti,ab OR 'time tradeoff':ti,ab OR 'tto':ti,ab OR 'visual analog scale':ti,ab OR 'visual analogue scale':ti,ab OR 'vas':ti,ab OR 'discrete choice experiment':ti,ab OR '15d':ti,ab OR 'health utilities index':ti,ab OR 'hui':ti,ab OR 'hui1':ti,ab OR 'hui2':ti,ab OR 'hui3':ti,ab OR 'rosser index':ti,ab OR 'rosser':ti,ab OR 'quality of wellbeing':ti,ab OR (('quality' NEAR/2 'wellbeing')':ti,ab) OR 'qwb':ti,ab                                                                |
| <b>#18</b> | #16 OR #17                                                                                                                                                                                                                                                                                                                                                                                                                                                                                                                                                                                                                                                                                                                                                                                                                                                        |
| <b>#19</b> | #9 AND #15                                                                                                                                                                                                                                                                                                                                                                                                                                                                                                                                                                                                                                                                                                                                                                                                                                                        |
| <b>#20</b> | #9 AND #18                                                                                                                                                                                                                                                                                                                                                                                                                                                                                                                                                                                                                                                                                                                                                                                                                                                        |
| <b>#21</b> | #19 OR #20                                                                                                                                                                                                                                                                                                                                                                                                                                                                                                                                                                                                                                                                                                                                                                                                                                                        |
| <b>#22</b> | #21 NOT ('animal'/de NOT 'human'/de)                                                                                                                                                                                                                                                                                                                                                                                                                                                                                                                                                                                                                                                                                                                                                                                                                              |
| <b>#23</b> | #22 NOT ([conference abstract]/lim OR [conference paper]/lim OR [conference review]/lim OR [editorial]/lim OR [erratum]/lim OR [letter]/lim OR [note]/lim)                                                                                                                                                                                                                                                                                                                                                                                                                                                                                                                                                                                                                                                                                                        |
| <b>#24</b> | #23 NOT 'case report'                                                                                                                                                                                                                                                                                                                                                                                                                                                                                                                                                                                                                                                                                                                                                                                                                                             |
| <b>#25</b> | #24 NOT (review:it NOT ((systematic:ti,ab OR meta:ti,ab) AND analy*':ti,ab OR ((indirect:ti,ab OR mixed:ti,ab) AND 'treatment comparison':ti,ab)))                                                                                                                                                                                                                                                                                                                                                                                                                                                                                                                                                                                                                                                                                                                |

**Table S2.** Cochrane search strategy

| ID  | Search                                                                                                                                                  |
|-----|---------------------------------------------------------------------------------------------------------------------------------------------------------|
| #1  | MeSH descriptor: [Subarachnoid Hemorrhage] explode all trees                                                                                            |
| #2  | (subarachnoid NEXT/2 (hemorrhage OR haemorrhage)):ti,ab                                                                                                 |
| #3  | MeSH descriptor: [Intracranial Aneurysm] explode all trees                                                                                              |
| #4  | ('intracranial aneurysm' OR 'aneurysm' OR 'aneurysmal' OR 'brain infarction' OR 'brain ischemia' OR 'cerebral infarction' OR 'cerebral ischemia'):ti,ab |
| #5  | (#1 OR #2) AND (#3 OR #4)                                                                                                                               |
| #6  | ('aneurysmal subarachnoid hemorrhage' OR 'aneurysmal subarachnoid haemorrhage'):ti,ab                                                                   |
| #7  | #5 OR #6                                                                                                                                                |
| #8  | ('vasospasm' OR 'brain vasospasm'):ti,ab                                                                                                                |
| #9  | #7 OR #8                                                                                                                                                |
| #10 | (conference OR 'conference paper'):pt                                                                                                                   |
| #11 | review:pt                                                                                                                                               |
| #12 | ((systematic OR meta) AND analy* OR ((indirect OR mixed) AND 'treatment comparison')):ti,ab                                                             |
| #13 | #11 NOT #12                                                                                                                                             |
| #14 | #9 NOT (#10 OR #13)                                                                                                                                     |

**Table S3.** Summary of data extraction variables

|                                |                                                                                                                                                                                                                                                                                                                                                                                                                      |                                                                                                                                                                               |
|--------------------------------|----------------------------------------------------------------------------------------------------------------------------------------------------------------------------------------------------------------------------------------------------------------------------------------------------------------------------------------------------------------------------------------------------------------------|-------------------------------------------------------------------------------------------------------------------------------------------------------------------------------|
| <b>Study objective</b>         | As stated in the publication                                                                                                                                                                                                                                                                                                                                                                                         |                                                                                                                                                                               |
| <b>Study characteristics</b>   | Author, year<br>Design (e.g. randomized, observational, survey)<br>Randomization & blinding methods (if RCTs)<br>Selection criteria and study design for non-RCTs<br>Baseline stratification<br>Years of study conduct                                                                                                                                                                                               | Follow up duration<br>Country<br>Key inclusion/exclusion criteria<br>Study phase<br>Sample size                                                                               |
| <b>Patient characteristics</b> | Age<br>Sex<br>Race/ethnicity<br>Body weight, BMI<br>Comorbidities                                                                                                                                                                                                                                                                                                                                                    | Morbidity score on admission<br>Days between admission and treatment<br>Treatment modality (coiling, clipping)                                                                |
| <b>Medication</b>              | Drugs (such as prophylactic “triple-H” therapy, clazosentan, and intraarterial papaverine calcium channel blockers, milrinone, tirilazad, fasudil, cilostazol, albumin, eicosapentaenoic acid, erythropoietin, corticosteroids, minocycline, deferoxamine, intrathecal thrombolytics)                                                                                                                                |                                                                                                                                                                               |
| <b>Study outcomes</b>          | <u>Economic</u><br>Direct costs<br>Indirect costs (such as loss of productivity, sickness, early retirement, provision of community health and social services)<br>Economic model results (including, CEA, CUA, BIA, CMA): (e.g. ICER, LYG, cost per QALY)<br>Resource use (such as rescue therapy, re-admission, length of hospital stay [ICU, main wards], discharge status after hospitalization, rehabilitation) | <u>Health-related quality of life/Humanistic</u><br>Utility, disutility scores<br>Health-related quality of life measures (disease specific and generic)<br>Care giver burden |

**Table S4.** Study characteristics of the 42 studies included in the Systematic Literature Review

| Author (Date)<br>Study ID                   | Country                                                                                | Data sources                               | No. of centers | Study design | No. pts | Clearly defined pts criteria/<br>Consecutive recruitment | Data collection years   | % of pts with VSP <sup>a</sup> |
|---------------------------------------------|----------------------------------------------------------------------------------------|--------------------------------------------|----------------|--------------|---------|----------------------------------------------------------|-------------------------|--------------------------------|
| <b>Clinical trials</b>                      |                                                                                        |                                            |                |              |         |                                                          |                         |                                |
| Raval et al. (2021) [30]                    | USA                                                                                    | -                                          | 1              | RCT          | 33      | Yes/ Yes                                                 | 2015–2017               | Unspecified                    |
| Ren et al. (2019) [31]                      | China                                                                                  | -                                          | 1              | RCT          | 86      | Yes /Yes                                                 | 2017–2019               | 13.79%–41.38%                  |
| Mahajan et al. (2014) [28]                  | India                                                                                  | -                                          | 1              | RCT          | 66      | Yes/ Yes                                                 | NR (over 2-year period) | 25%–26.5%                      |
| Senbokuya et al. (2013) [33]                | Japan                                                                                  | UMIN000004347                              | 7              | RCT          | 109     | Yes/ Yes                                                 | 2009–2010               | 13%                            |
| Macdonald et al. (2012) [27]<br>CONSCIOUS-1 | Austria, Canada, Finland, France, Germany, Israel, Italy, Sweden, Switzerland, UK, USA | NCT00111085                                | 52             | Post hoc RCT | 409     | Yes/ Yes                                                 | 2005–2006               | 58.67%                         |
| Rivero-Arias et al. (2009) [32]<br>ISAT     | UK                                                                                     | ISRCTN49866681                             | 42             | Post hoc RCT | 1,644   | Yes/ Yes                                                 | 1997–2002               | 25.2%                          |
| Fountas et al. (2008) [26]                  | USA                                                                                    | -                                          | -              | RCT          | 74      | Yes/ Yes                                                 | 1999–2001               | 32%–41.6%                      |
| Zwienenberg-Lee et al. (2008) [34]          | USA, Canada, Netherlands                                                               | National Institutes of Health–funded study | 10             | RCT          | 170     | Yes/ Yes                                                 | 2000–2005               | 54.1%–56.5% <sup>b</sup>       |
| Prevedello et al. (2006) [29]               | Brazil                                                                                 | Hospital Nossa Senhora das Gracias         | 1              | Non-RCT      | 72      | Yes/ NR                                                  | 2000–2004               | 47.9%–58.3%                    |
| <b>Observational studies</b>                |                                                                                        |                                            |                |              |         |                                                          |                         |                                |
| Chatrath et al. (2020) [41]                 | USA                                                                                    | University of Virginia                     | 1              | RLC          | 206     | Yes/ Yes                                                 | 2011–2018               | Unspecified                    |

| Author (Date)<br>Study ID     | Country | Data sources                                                  | No. of centers | Study design | No. pts | Clearly defined pts criteria/<br>Consecutive recruitment | Data collection years | % of pts with VSP <sup>a</sup> |
|-------------------------------|---------|---------------------------------------------------------------|----------------|--------------|---------|----------------------------------------------------------|-----------------------|--------------------------------|
| Hoffman et al. (2020) [46]    | USA     | NRD                                                           | Multicenter    | RLC          | 8,346   | Yes/ Unclear                                             | 2010–2014             | 3.2%–4.0%                      |
| Sokolowski et al. (2021) [56] | USA     | -                                                             | 1              | RLC          | 195     | Yes /Yes                                                 | 2011–2018             | 11%–57.1% <sup>c</sup>         |
| Strickland et al. (2020) [59] | USA     | Tertiary referral UH and safety net CH                        | 2              | RCC          | 131     | Yes/Unclear                                              | 2010–2015             | 31%–32.9% <sup>c</sup>         |
| Wilde et al. (2020) [63]      | USA     | Value Data Driven Outcome Database and medical records        | -              | RCC          | 198     | Yes/Unclear                                              | 2001–2017             | 16.7%–18.2% <sup>d</sup>       |
| Chotai et al. (2021) [42]     | USA     | NIS database                                                  | 1              | RCC          | 5,353   | Yes/Yes                                                  | 2012–2015             | 19%                            |
| Rumalla et al. (2018) [52]    | USA     | NRD                                                           | -              | RLC          | 12,777  | Yes/ Yes                                                 | 2013–2013             | 2.7%                           |
| Abulhasan et al. (2018) [35]  | Canada  | Hospital registry and ICU database                            | 1              | RLC          | 419     | Yes/ Yes                                                 | 2010–2016             | 24.2%                          |
| Alaraj et al. (2017) [36]     | USA     | Department of Neurosurgery, University of Illinois at Chicago | 1              | RCC          | 174     | Yes/ Yes                                                 | 2011–2014             | 25.9%                          |
| Drazin et al. (2015) [44]     | USA     | Cedars Sinai Medical Center                                   | 1              | RCC          | 107     | Yes/Yes                                                  | -                     | 32.3%–58%                      |
| Kreiter et al. (2013) [48]    | USA     | Columbia University Subarachnoid Hemorrhage Outcomes Project  | 1              | PLC          | 534     | Yes/Yes                                                  | 1996–2001             | 14%                            |
| Khatri et al. (2011) [47]     | USA     | NIS database                                                  | -              | RCC          | 74,356  | Yes/Unclear                                              | 2005–2007             | Unspecified                    |
| Chou et al. (2010) [43]       | USA     | Duke University Medical Center database                       | 1              | RCC          | 198     | Yes/Yes                                                  | 1999–2004             | 61.3% <sup>b</sup>             |

| Author (Date)<br>Study ID   | Country  | Data sources                                                                        | No. of centers | Study design    | No. pts | Clearly defined pts criteria/<br>Consecutive recruitment | Data collection years | % of pts with VSP <sup>a</sup> |
|-----------------------------|----------|-------------------------------------------------------------------------------------|----------------|-----------------|---------|----------------------------------------------------------|-----------------------|--------------------------------|
| Springer et al. (2009) [58] | USA      | Columbia University Subarachnoid Hemorrhage Outcomes Project                        | 1              | PLC             | 232     | -/Unclear                                                | 1996–2002             | Unspecified                    |
| Frontera et al. (2009) [11] |          | Columbia University Subarachnoid Hemorrhage Outcomes Project                        | 1              | PLC             | 580     | -/Yes                                                    | 1996–2002             | 16%–45%                        |
| Zaidat et al. (2009) [65]   | USA      | -                                                                                   | 1              | RCC             | 216     | Yes/Yes                                                  | 1999–2005             | 35%–55% <sup>b</sup>           |
| Badjatia et al. (2005) [39] | USA      | -                                                                                   | 1              | RCC             | 352     | Yes/Unclear                                              | 1995–2002             | 29.2%                          |
| Suarez et al. (2004) [60]   | USA      | University Hospitals of Cleveland                                                   | 1              | RCC             | 140     | Yes/Yes                                                  | 1998–2000             | 23.5%                          |
| Yundt et al. (1996) [64]    | USA      | Barnes Hospital                                                                     | 1              | RCC             | 112     | Yes/Yes                                                  | 1993–1994             | 12.5%–51.9%                    |
| Alay et al. (2020) [37]     | Turkey   | Ankara Numune Education & Research Hospital                                         | 1              | RCC             | 143     | Yes/ Unclear                                             | During 2013           | 16%–26%                        |
| Harris et al. (2021) [45]   | UK       | Havering and Redbridge University Hospital NHS Trust, Queen’s Hospital, Romford, UK | 1              | RLC             | 137     | Yes/ Yes                                                 | 2012–2018             | 27.5%–47.4%                    |
| Sousa et al. (2019) [57]    | Portugal | Santa Maria University Hospital                                                     | 1              | Cross-sectional | 14      | Yes/ Yes                                                 | 2004–2006             | 21.3%                          |
| Ali et al. (2018) [38]      | Turkey   | Istanbul Medical Faculty, Istanbul                                                  | 1              | PLC             | 82      | Yes/ Yes                                                 | 2013–2015             | 84%                            |
| Bercker et al. (2018) [40]  | Germany  | University Hospital of Leipzig                                                      | 1              | RCC             | 276     | Yes/ Yes                                                 | 2009–2014             | 17.2%–33.9%                    |



| Author (Date)<br>Study ID     | Country     | Data sources                                                                               | No. of centers | Study design | No. pts | Clearly defined pts criteria/<br>Consecutive recruitment | Data collection years | % of pts with VSP <sup>a</sup> |
|-------------------------------|-------------|--------------------------------------------------------------------------------------------|----------------|--------------|---------|----------------------------------------------------------|-----------------------|--------------------------------|
| Sakr et al. (2016) [53]       | Germany     | Friedrich-Schiller university hospital surgical ICU                                        | 1              | RCC          | 142     | Yes/ Yes                                                 | 2004–2010             | 65.5%                          |
| Vetkas et al. (2013) [24]     | Estonia     | Department of Neurology and Neurosurgery, University of Tartu                              | 1              | RLC          | 114     | Yes/ Yes                                                 | 2001–2010             | 24%                            |
| Szmuda et al. (2013) [61]     | Poland      | Neurosurgery Department, Medical University of Gdansk                                      | 1              | RCC          | 206     | Yes/Unclear                                              | 1997–2006             | 7.8% <sup>e</sup>              |
| Taylor et al. (2011) [62]     | UK          | 15 bedded tertiary referral unit, National Hospital for Neurology and Neurosurgery, London | 1              | RLC          | 47      | Yes/ Yes                                                 | 2004–2008             | 38%                            |
| Soehle et al. (2007) [55]     | UK          | Unclear                                                                                    | 1              | PLC          | 29      | Yes/<br>Unclear                                          | NR                    | Unspecified                    |
| Scharbrodt et al. (2009) [54] | Germany     | NR                                                                                         | 1              | RLC          | 128     | Yes/ Yes                                                 | 1995–2003             | 25%                            |
| Niskanen et al. (2004) [50]   | Finland     | Kuopio University Hospital                                                                 | 1              | RCC          | 171     | Yes/<br>Unclear                                          | 1997–2000             | 5.8%–5.9%                      |
| Morgan et al. (2000) [49]     | Australia   | Royal North Shore Hospital                                                                 | 1              | RLC          | 200     | Yes/ Yes                                                 | 1992–1998             | 42.5%                          |
| Ogden et al. (1994) [51]      | New Zealand | Auckland Hospital                                                                          | 1              | PLC          | 89      | Yes/ Yes                                                 | 1988–1991             | 24.7%                          |

<sup>a</sup> If % unspecified, VSP data was available, but the number of VSP patients was not reported. <sup>b</sup> Transcranial Doppler VSP. <sup>c</sup> Clinical VSP. <sup>d</sup> Mild to severe. <sup>e</sup> Reported as delayed cerebral ischemia.

**Abbreviations:** aSAH, aneurysmal subarachnoid hemorrhage; CH, county hospital; CONSCIOUS-1, Clazosentan to Overcome Neurological Ischemia and Infarction Occurring After Subarachnoid Hemorrhage; ISAT, International Subarachnoid Aneurysm Trial; NIS, Nationwide Inpatient Sample; No., number; NRD, Nationwide Readmissions Database; PLC, prospective longitudinal cohort; pts, patients; RCC, retrospective case control; RCT, randomized controlled trial; RLC, retrospective longitudinal cohort; UH, university hospital; VSP, cerebral vasospasm.

## References

1. Macdonald RL, Schweizer TA. Spontaneous subarachnoid haemorrhage. *Lancet*. 2017;389(10069):655-66. [https://doi.org/10.1016/S0140-6736\(16\)30668-7](https://doi.org/10.1016/S0140-6736(16)30668-7).
2. D'Souza S. Aneurysmal Subarachnoid Hemorrhage. *J Neurosurg Anesthesiol*. 2015;27(3):222-40. <https://doi.org/10.1097/ANA.000000000000130>.
3. de Rooij NK, Linn FH, van der Plas JA, Algra A, Rinkel GJ. Incidence of subarachnoid haemorrhage: a systematic review with emphasis on region, age, gender and time trends. *J Neurol Neurosurg Psychiatry*. 2007;78(12):1365-72. <https://doi.org/10.1136/jnnp.2007.117655>.
4. Etminan N, Chang HS, Hackenberg K, de Rooij NK, Vergouwen MDI, Rinkel GJE, et al. Worldwide Incidence of Aneurysmal Subarachnoid Hemorrhage According to Region, Time Period, Blood Pressure, and Smoking Prevalence in the Population: A Systematic Review and Meta-analysis. *JAMA Neurol*. 2019;76(5):588-97. <https://doi.org/10.1001/jamaneurol.2019.0006>.
5. Bauer AM, Rasmussen PA. Treatment of intracranial vasospasm following subarachnoid hemorrhage. *Front Neurol*. 2014;5:72. <https://doi.org/10.3389/fneur.2014.00072>.
6. Ingall T, Asplund K, Mahonen M, Bonita R. A multinational comparison of subarachnoid hemorrhage epidemiology in the WHO MONICA stroke study. *Stroke*. 2000;31(5):1054-61. <https://doi.org/10.1161/01.str.31.5.1054>.
7. Hughes JD, Bond KM, Mekary RA, Dewan MC, Rattani A, Baticulon R, et al. Estimating the Global Incidence of Aneurysmal Subarachnoid Hemorrhage: A Systematic Review for Central Nervous System Vascular Lesions and Meta-Analysis of Ruptured Aneurysms. *World Neurosurg*. 2018;115:430-47. <https://doi.org/10.1016/j.wneu.2018.03.220>.
8. Connolly ES, Jr., Rabinstein AA, Carhuapoma JR, Derdeyn CP, Dion J, Higashida RT, et al. Guidelines for the management of aneurysmal subarachnoid hemorrhage: a guideline for

- healthcare professionals from the American Heart Association/American Stroke Association. *Stroke*. 2012;43(6):1711-37. <https://doi.org/10.1161/STR.0b013e3182587839>.
9. Stienen MN, Germans M, Burkhardt JK, Neidert MC, Fung C, Bervini D, et al. Predictors of In-Hospital Death After Aneurysmal Subarachnoid Hemorrhage: Analysis of a Nationwide Database (Swiss SOS [Swiss Study on Aneurysmal Subarachnoid Hemorrhage]). *Stroke*. 2018;49(2):333-40. <https://doi.org/10.1161/STROKEAHA.117.019328>.
  10. Dorsch NW, King MT. A review of cerebral vasospasm in aneurysmal subarachnoid haemorrhage Part I: Incidence and effects. *J Clin Neurosci*. 1994;1(1):19-26. [https://doi.org/10.1016/0967-5868\(94\)90005-1](https://doi.org/10.1016/0967-5868(94)90005-1).
  11. Frontera JA, Fernandez A, Schmidt JM, Claassen J, Wartenberg KE, Badjatia N, et al. Defining vasospasm after subarachnoid hemorrhage: what is the most clinically relevant definition? *Stroke*. 2009;40(6):1963-8. <https://doi.org/10.1161/STROKEAHA.108.544700>.
  12. Macdonald RL, Kassell NF, Mayer S, Ruefenacht D, Schmiedek P, Weidauer S, et al. Clazosentan to overcome neurological ischemia and infarction occurring after subarachnoid hemorrhage (CONSCIOUS-1): randomized, double-blind, placebo-controlled phase 2 dose-finding trial. *Stroke*. 2008;39(11):3015-21. <https://doi.org/10.1161/STROKEAHA.108.519942>.
  13. Macdonald RL. Delayed neurological deterioration after subarachnoid haemorrhage. *Nat Rev Neurol*. 2014;10(1):44-58. <https://doi.org/10.1038/nrneurol.2013.246>.
  14. Crowley RW, Medel R, Dumont AS, Ildigwe D, Kassell NF, Mayer SA, et al. Angiographic vasospasm is strongly correlated with cerebral infarction after subarachnoid hemorrhage. *Stroke*. 2011;42(4):919-23. <https://doi.org/10.1161/STROKEAHA.110.597005>.
  15. Geraghty JR, Testai FD. Delayed Cerebral Ischemia after Subarachnoid Hemorrhage: Beyond Vasospasm and Towards a Multifactorial Pathophysiology. *Curr Atheroscler Rep*. 2017;19(12):50. <https://doi.org/10.1007/s11883-017-0690-x>.
  16. Dankbaar JW, Rijdsdijk M, van der Schaaf IC, Velthuis BK, Wermer MJ, Rinkel GJ. Relationship between vasospasm, cerebral perfusion, and delayed cerebral ischemia after aneurysmal

- subarachnoid hemorrhage. *Neuroradiology*. 2009;51(12):813-9.  
<https://doi.org/10.1007/s00234-009-0575-y>.
17. Rabinstein AA, Weigand S, Atkinson JL, Wijdicks EF. Patterns of cerebral infarction in aneurysmal subarachnoid hemorrhage. *Stroke*. 2005;36(5):992-7.  
<https://doi.org/10.1161/01.STR.0000163090.59350.5a>.
  18. Daou BJ, Koduri S, Thompson BG, Chaudhary N, Pandey AS. Clinical and experimental aspects of aneurysmal subarachnoid hemorrhage. *CNS Neurosci Ther*. 2019;25(10):1096-112.  
<https://doi.org/10.1111/cns.13222>.
  19. Muehlschlegel S. Subarachnoid Hemorrhage. *Continuum (Minneap Minn)*. 2018;24(6):1623-57. <https://doi.org/10.1212/CON.0000000000000679>.
  20. Vergouwen MD, Vermeulen M, van Gijn J, Rinkel GJ, Wijdicks EF, Muizelaar JP, et al. Definition of delayed cerebral ischemia after aneurysmal subarachnoid hemorrhage as an outcome event in clinical trials and observational studies: proposal of a multidisciplinary research group. *Stroke*. 2010;41(10):2391-5.  
<https://doi.org/10.1161/STROKEAHA.110.589275>.
  21. Dorsch N. A clinical review of cerebral vasospasm and delayed ischaemia following aneurysm rupture. *Acta Neurochir Suppl*. 2011;110(Pt 1):5-6. [https://doi.org/10.1007/978-3-7091-0353-1\\_1](https://doi.org/10.1007/978-3-7091-0353-1_1).
  22. Hollingworth M, Jamjoom AAB, Bulters D, Patel HC. How is vasospasm screening using transcranial Doppler associated with delayed cerebral ischemia and outcomes in aneurysmal subarachnoid hemorrhage? *Acta Neurochir (Wien)*. 2019;161(2):385-92.  
<https://doi.org/10.1007/s00701-018-3765-8>.
  23. Page MJ, McKenzie JE, Bossuyt PM, Boutron I, Hoffmann TC, Mulrow CD, et al. The PRISMA 2020 statement: An updated guideline for reporting systematic reviews. *J Clin Epidemiol*. 2021;134:178-89. <https://doi.org/10.1016/j.jclinepi.2021.03.001>.

24. Vetkas A, Lepik T, Eilat T, Ratsep T, Asser T. Emotional health and quality of life after aneurysmal subarachnoid hemorrhage. *Acta Neurochir (Wien)*. 2013;155(6):1107-14. <https://doi.org/10.1007/s00701-013-1683-3>.
25. Vetkas A, Prans E, Koks S, Ratsep T, Asser T. Aneurysmal subarachnoid haemorrhage: Effect of CRHR1 genotype on mental health-related quality of life. *Sci Rep*. 2020;10(1):724. <https://doi.org/10.1038/s41598-020-57527-4>.
26. Fountas KN, Machinis TG, Robinson JS, Sevin C, Fezoulidis NI, Castresana M, et al. The role of magnesium sulfate in the treatment of vasospasm in patients with spontaneous subarachnoid haemorrhage. *Acta Neurochirurgica, Supplement*. 2008;104:269-73. [https://doi.org/10.1007/978-3-211-75718-5\\_55](https://doi.org/10.1007/978-3-211-75718-5_55).
27. Macdonald RL, Hunsche E, Schuler R, Wlodarczyk J, Mayer SA. Quality of life and healthcare resource use associated with angiographic vasospasm after aneurysmal subarachnoid hemorrhage. *Stroke*. 2012;43(4):1082-8. <https://doi.org/10.1161/STROKEAHA.111.634071>.
28. Mahajan C, Chouhan RS, Rath GP, Dash HH, Suri A, Chandra PS, et al. Effect of intraoperative brain protection with propofol on postoperative cognition in patients undergoing temporary clipping during intracranial aneurysm surgery. *Neurol India*. 2014;62(3):262-8. <https://doi.org/10.4103/0028-3886.136908>.
29. Prevedello DM, Cordeiro JG, de Moraes AL, Saucedo NSJ, Chen IB, Araújo JC. Magnesium sulfate: role as possible attenuating factor in vasospasm morbidity. *Surg Neurol*. 2006;65(Suppl 1):S1:14-S1:20. <https://doi.org/10.1016/j.surneu.2005.11.035>.
30. Raval RN, Small O, Magsino K, Chakravarthy V, Austin B, Applegate R, et al. Remote Ischemic Pre-conditioning in Subarachnoid Hemorrhage: A Prospective Pilot Trial. *Neurocrit Care*. 2021;34(3):968-73. <https://doi.org/10.1007/s12028-020-01122-y>.
31. Ren C, Xu H, Xu G, Liu L, Liu G, Zhang Z, et al. Effect of intraoperative infusion of dexmedetomidine on postoperative recovery in patients undergoing endovascular

- interventional therapies: A prospective, randomized, controlled trial. *Brain Behav.* 2019;9(7):e01317. <https://doi.org/10.1002/brb3.1317>.
32. Rivero-Arias O, Wolstenholme J, Gray A, Molyneux AJ, Kerr RS, Yarnold JA, et al. The costs and prognostic characteristics of ischaemic neurological deficit due to subarachnoid haemorrhage in the United Kingdom. Evidence from the MRC International Subarachnoid Aneurysm Trial. *J Neurol.* 2009;256(3):364-73. <https://doi.org/10.1007/s00415-009-0034-z>.
  33. Senbokuya N, Kinouchi H, Kanemaru K, Ohashi Y, Fukamachi A, Yagi S, et al. Effects of cilostazol on cerebral vasospasm after aneurysmal subarachnoid hemorrhage: a multicenter prospective, randomized, open-label blinded end point trial. *J Neurosurg.* 2013;118(1):121-30. <https://doi.org/10.3171/2012.9.JNS12492>.
  34. Zwienerberg-Lee M, Hartman J, Rudisill N, Madden LK, Smith K, Eskridge J, et al. Effect of prophylactic transluminal balloon angioplasty on cerebral vasospasm and outcome in patients with Fisher grade III subarachnoid hemorrhage: results of a phase II multicenter, randomized, clinical trial. *Stroke.* 2008;39(6):1759-65. <https://doi.org/10.1161/STROKEAHA.107.502666>.
  35. Abulhasan YB, Alabdulraheem N, Schiller I, Rachel SP, Dendukuri N, Angle MR, et al. Health Care-Associated Infections after Subarachnoid Hemorrhage. *World Neurosurg.* 2018;115:e393-e403. <https://doi.org/10.1016/j.wneu.2018.04.061>.
  36. Alaraj A, Hussein AE, Esfahani DR, Amin-Hanjani S, Aletich VA, Charbel FT. Reducing length of stay in aneurysmal subarachnoid hemorrhage: A three year institutional experience. *J Clin Neurosci.* 2017;42:66-70. <https://doi.org/10.1016/j.jocn.2017.03.049>.
  37. Alay GH, Postaci NA, Aytac I, Acar F, Ornek D, Dikmen B. Retrospective analysis of anesthetic management in the cerebral aneurysm treatment: Issues in the course of endovascular versus surgical treatment. *Kuwait Med J.* 2020;52(2):169-74.
  38. Ali A, Tanirgan G, Sabanci PA, Sivrikoz N, Abdullah T, Sencer A, et al. Relation of gray-white matter ratio with long-term cognitive functions and quality of life in patients with mild to

- moderate aneurysmal subarachnoid hemorrhage: a prospective observational study. *Acta Neurochir (Wien)*. 2018;160(1):181-9. <https://doi.org/10.1007/s00701-017-3374-y>.
39. Badjatia N, Topcuoglu MA, Buonanno FS, Smith EE, Nogueira RG, Rordorf GA, et al. Relationship between hyperglycemia and symptomatic vasospasm after subarachnoid hemorrhage. *Crit Care Med*. 2005;33(7):1603-9. <https://doi.org/10.1097/01.ccm.0000168054.60538.2b>.
40. Bercker S, Winkelmann T, Busch T, Laudi S, Lindner D, Meixensberger J. Hydroxyethyl starch for volume expansion after subarachnoid haemorrhage and renal function: Results of a retrospective analysis. *PLoS One*. 2018;13(2):e0192832. <https://doi.org/10.1371/journal.pone.0192832>.
41. Chatrath A, Soldozy S, Sokolowski JD, Burke RM, Schultz JG, Rannigan ZC, et al. Endovascular and Surgical Treatment Is Predictive of Readmission Risk After Aneurysmal Subarachnoid Hemorrhage. *World Neurosurg*. 2020;142:e494-e501. <https://doi.org/10.1016/j.wneu.2020.07.079>.
42. Chotai S, Patel PD, Liles C, Chen H, Shannon CN, Froehler MT, et al. Impact of Neurovascular Comorbidities and Complications on Outcomes After Procedural Management of Intracranial Aneurysm: Part 2, Ruptured Intracranial Aneurysm. *World Neurosurg*. 2021;146:e270-e312. <https://doi.org/10.1016/j.wneu.2020.10.091>.
43. Chou CH, Reed SD, Allsbrook JS, Steele JL, Schulman KA, Alexander MJ. Costs of vasospasm in patients with aneurysmal subarachnoid hemorrhage. *Neurosurgery*. 2010;67(2):345-51. <https://doi.org/10.1227/01.NEU.0000371980.08391.71>.
44. Drazin D, Rosner J, Nuno M, Alexander MJ, Schievink WI, Palestrant D, et al. Type of admission is associated with outcome of spontaneous subarachnoid hemorrhage. *Int J Stroke*. 2015;10(4):529-33. <https://doi.org/10.1111/ijvs.12005>.
45. Harris L, Hill CS, Elliot M, Fitzpatrick T, Ghosh A, Vindlacheruvu R. Comparison between outcomes of endovascular and surgical treatments of ruptured anterior communicating



- artery aneurysms. *Br J Neurosurg.* 2021;35(3):313-8.  
<https://doi.org/10.1080/02688697.2020.1812517>.
46. Hoffman H, Jalal MS, Chin LS. A Propensity Score-Matched Comparison of Readmission Rates Associated With Microsurgical Clipping and Endovascular Treatment of Ruptured Intracranial Aneurysms. *J Stroke Cerebrovasc Dis.* 2020;29(5):104696.  
<https://doi.org/10.1016/j.jstrokecerebrovasdis.2020.104696>.
47. Khatri R, Tariq N, Vazquez G, Suri MF, Ezzeddine MA, Qureshi AI. Outcomes after nontraumatic subarachnoid hemorrhage at hospitals offering angioplasty for cerebral vasospasm: a national level analysis in the United States. *Neurocrit Care.* 2011;15(1):34-41.  
<https://doi.org/10.1007/s12028-010-9423-5>.
48. Kreiter KT, Rosengart AJ, Claassen J, Fitzsimmons BF, Peery S, Du YE, et al. Depressed mood and quality of life after subarachnoid hemorrhage. *J Neurol Sci.* 2013;335(1-2):64-71.  
<https://doi.org/10.1016/j.jns.2013.08.024>.
49. Morgan MK, Jonker B, Finfer S, Harrington T, Dorsch NW. Aggressive management of aneurysmal subarachnoid haemorrhage based on a papaverine angioplasty protocol. *J Clin Neurosci.* 2000;7(4):305-8. <https://doi.org/10.1054/jocn.1999.0224>.
50. Niskanen M, Koivisto T, Ronkainen A, Rinne J, Ruokonen E. Resource use after subarachnoid hemorrhage: comparison between endovascular and surgical treatment. *Neurosurgery.* 2004;54(5):1081-6. <https://doi.org/10.1227/01.neu.0000119350.80122.43>.
51. Ogden JA, Mee EW, Henning M. A prospective study of psychosocial adaptation following subarachnoid haemorrhage. *Neuropsychol Rehabil.* 1994;4(1):7-30.  
<https://doi.org/10.1080/09602019408401453>.
52. Rumalla K, Smith KA, Arnold PM, Mittal MK. Subarachnoid Hemorrhage and Readmissions: National Rates, Causes, Risk Factors, and Outcomes in 16,001 Hospitalized Patients. *World Neurosurg.* 2018;110:e100-e11. <https://doi.org/10.1016/j.wneu.2017.10.089>.

53. Sakr Y, Dunisch P, Santos C, Matthes L, Zeidan M, Reinhart K, et al. Poor outcome is associated with less negative fluid balance in patients with aneurysmal subarachnoid hemorrhage treated with prophylactic vasopressor-induced hypertension. *Ann Intensive Care*. 2016;6(1):25. <https://doi.org/10.1186/s13613-016-0128-6>.
54. Scharbrodt W, Stein M, Schreiber V, Boker DK, Oertel MF. The prediction of long-term outcome after subarachnoid hemorrhage as measured by the Short Form-36 Health Survey. *J Clin Neurosci*. 2009;16(11):1409-13. <https://doi.org/10.1016/j.jocn.2009.01.011>.
55. Soehle M, Chatfield DA, Czosnyka M, Kirkpatrick PJ. Predictive value of initial clinical status, intracranial pressure and transcranial Doppler pulsatility after subarachnoid haemorrhage. *Acta Neurochir (Wien)*. 2007;149(6):575-83. <https://doi.org/10.1007/s00701-007-1149-6>.
56. Sokolowski JD, Chen CJ, Soldozy S, Mastorakos P, Burke RM, Nguyen JM, et al. Nimodipine after aneurysmal subarachnoid hemorrhage: Fourteen-day course for patients that meet criteria for early hospital discharge. *Clin Neurol Neurosurg*. 2021;200:106299. <https://doi.org/10.1016/j.clineuro.2020.106299>.
57. Sousa L, Antunes A, Mendes T, Reimao S, Neto LL, Campos J. Long-term Neuropsychiatric and Neuropsychological Sequelae of Endovascularly Treated Aneurysmal Subarachnoid Hemorrhage. *Acta Med Port*. 2019;32(11):706-13. <https://doi.org/10.20344/amp.10894>.
58. Springer MV, Schmidt JM, Wartenberg KE, Frontera JA, Badjatia N, Mayer SA. Predictors of global cognitive impairment 1 year after subarachnoid hemorrhage. *Neurosurgery*. 2009;65(6):1043-50. <https://doi.org/10.1227/01.NEU.0000359317.15269.20>.
59. Strickland BA, Mert M, Ravina K, Chartrain A, Rennert RC, Bakhsheshian J, et al. Discrepancy in Neurologic Outcomes Following Aneurysmal Subarachnoid Hemorrhage as a Function of Socioeconomic Class. *World Neurosurg*. 2020;138:e787-e94. <https://doi.org/10.1016/j.wneu.2020.03.087>.
60. Suarez JI, Shannon L, Zaidat OO, Suri MF, Singh G, Lynch G, et al. Effect of human albumin administration on clinical outcome and hospital cost in patients with subarachnoid

- hemorrhage. *J Neurosurg.* 2004;100(4):585-90.  
<https://doi.org/10.3171/jns.2004.100.4.0585>.
61. Szmuda T, Słoniewski P, Waszak PM, Kindrachuk M, Olijewski W. Short- and long-term outcome of surgically treated ruptured internal carotid artery aneurysms. *Acta Neuropsychologica* 2013;11(4):403-17. <https://doi.org/doi:10.5604/17307503.1090469>.
62. Taylor CJ, Robertson F, Brealey D, O'Shea F, Stephen T, Brew S, et al. Outcome in poor grade subarachnoid hemorrhage patients treated with acute endovascular coiling of aneurysms and aggressive intensive care. *Neurocrit Care.* 2011;14(3):341-7.  
<https://doi.org/10.1007/s12028-010-9377-7>.
63. Wilde H, Twitchell S, Reese J, Guan J, Eli IM, Karsy M, et al. Evaluation of disease severity and treatment intensity as cost drivers for ruptured intracranial aneurysms. *Acta Neurochir (Wien).* 2020;162(1):157-67. <https://doi.org/10.1007/s00701-019-04153-3>.
64. Yundt KD, Dacey RG, Jr., Diringer MN. Hospital resource utilization in the treatment of cerebral aneurysms. *J Neurosurg.* 1996;85(3):403-9.  
<https://doi.org/10.3171/jns.1996.85.3.0403>.
65. Zaidat OO, Ionita CC, Hussain SI, Alexander MJ, Friedman AH, Graffagnino C. Impact of ruptured cerebral aneurysm coiling and clipping on the incidence of cerebral vasospasm and clinical outcome. *J Neuroimaging.* 2009;19(2):144-9. <https://doi.org/10.1111/j.1552-6569.2008.00285.x>.
66. Fisher CM, Kistler JP, Davis JM. Relation of cerebral vasospasm to subarachnoid hemorrhage visualized by computerized tomographic scanning. *Neurosurgery.* 1980;6(1):1-9.  
<https://doi.org/10.1227/00006123-198001000-00001>.
67. National Institute for Health and Care Excellence (NICE) Value Based Assessment of Health Technologies (Consultation Paper). <https://www.nice.org.uk/Media/Default/About/what-we-do/NICE-guidance/NICE-technology-appraisals/VBA-TA-Methods-Guide-for-Consultation.pdf>. Accessed 17 Jan 2022.
